# Supplementary material for: Chemical Characterization and Seasonality of Ambient Particles (PM2.5) in the City Centre of Addis Ababa
Source: PubMed Central journal article supplement (PMC7579520; doi:10.3390/ijerph17196998), 2020-09-24
Supplement: ijerph-17-06998-s001.pdf [file ijerph-17-06998-s001.pdf]

Supplementary Information

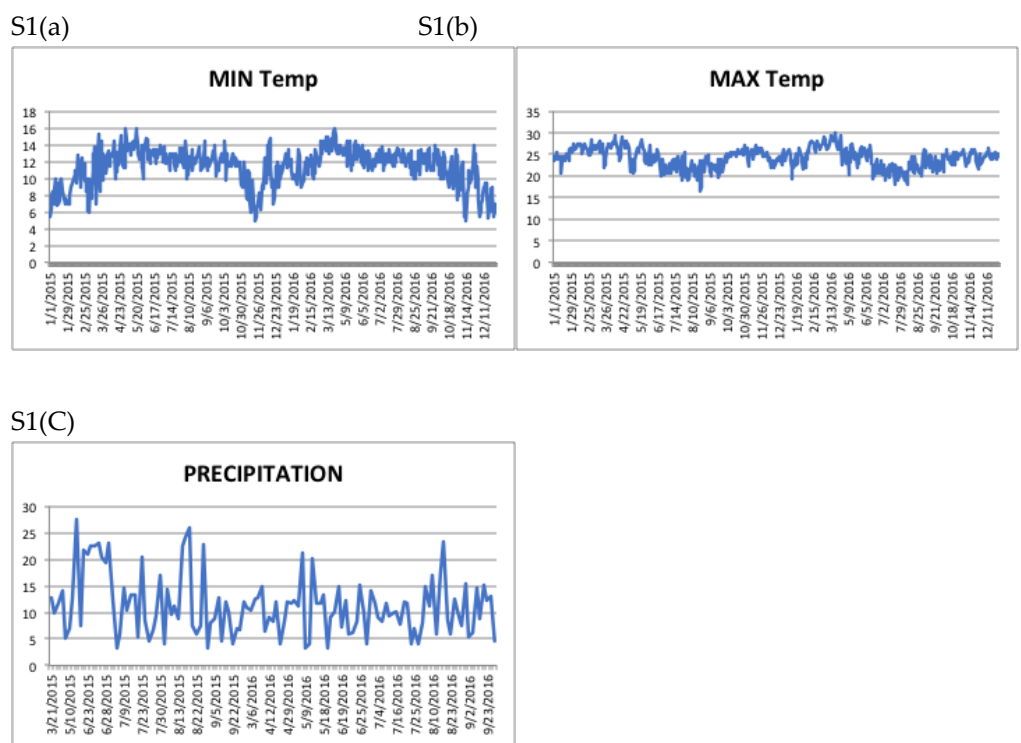

**Supplemental Figure S1.** Mean daily Minimum Temperature ( $^{\circ}\text{C}$ ) (a), Maximum Temperature ( $^{\circ}\text{C}$ ) (b) and Precipitation (mm) (C) in Central Addis Ababa during 2015-2016.

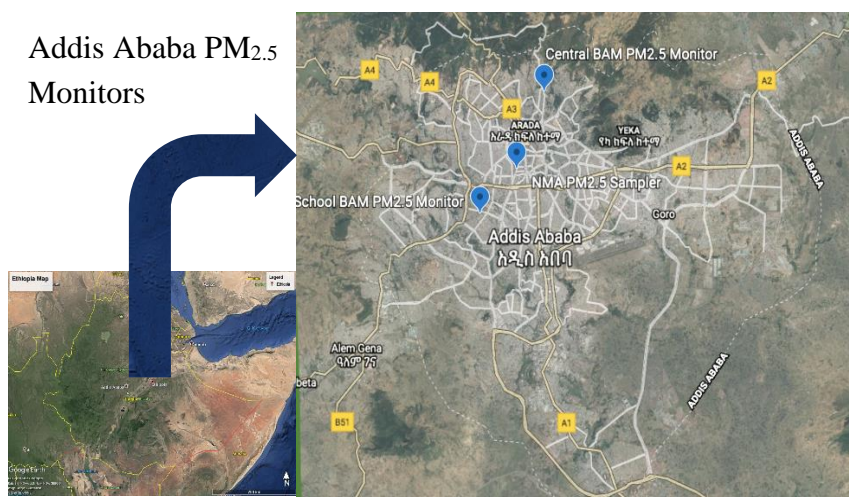

**Supplemental Figure S2.** Fine PM Monitoring stations in Addis Ababa, Ethiopia. NMA PM<sub>2.5</sub> Sampler (Met Station site - this study); US Diplomatic Post BAM Monitors (Central and School sites) are shown in figure with blue pin.

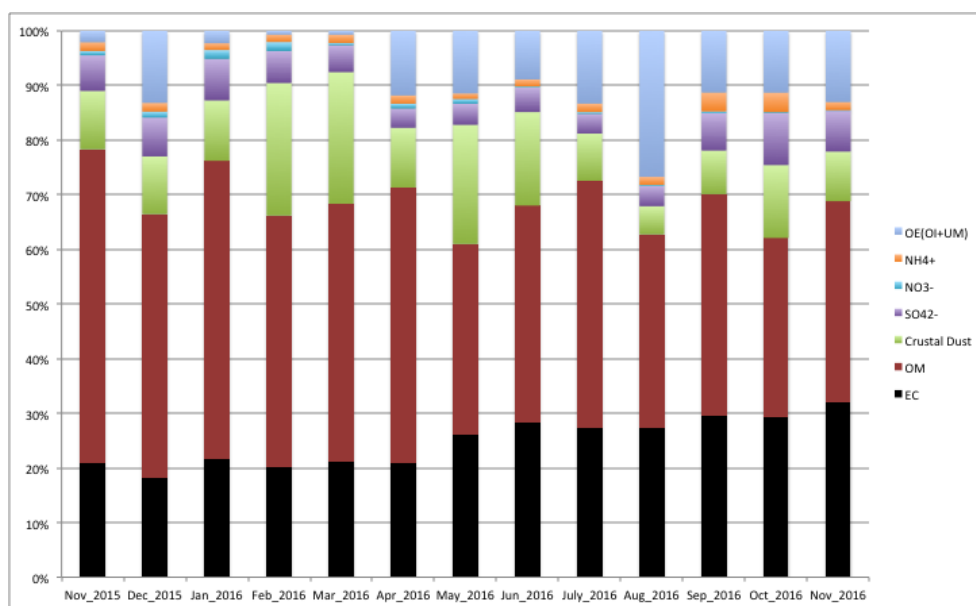

**Supplementary Figure S3.** The percentage contribution of major mass constituents of PM<sub>2.5</sub> in Central Addis Ababa; EC=Elemental carbon. OM=Organic matter; Other Ions= ws Na<sup>+</sup>, ws Cl<sup>-</sup>, ws K<sup>+</sup>, Ca<sup>2+</sup>; UM= Unidentified matter.

**Supplemental Table S1**

**Table S1.** Crustal Enrichment Factor(CEF>10) of 15 trace-elements identified from PM<sub>2.5</sub>. samples in central Addis Ababa.

| Element         | <sup>a</sup> Mean CEF | STDEV CEF | MIN CEF | MAX CEF |
|-----------------|-----------------------|-----------|---------|---------|
| Thallium (Tl)   | 11                    | 10        | 1       | 21      |
| Nickel (Ni)     | 14                    | 14        | 0       | 28      |
| Phosphorous (P) | 15                    | 84        | 0       | 99      |
| Vanadium (V)    | 21                    | 17        | 4       | 38      |
| Molybdenum (Mo) | 37                    | 48        | 0       | 85      |
| Boron (B)       | 69                    | 92        | 0       | 161     |
| Zinc (Zn)       | 87                    | 72        | 15      | 159     |
| Copper (Cu)     | <b>115</b>            | 675       | 0       | 790     |
| Arsenic (As)    | <b>121</b>            | 124       | 0       | 245     |
| Lead (Pb)       | <b>124</b>            | 191       | 0       | 315     |
| Tin (Sn)        | <b>193</b>            | 909       | 0       | 1102    |
| Sulfur (S)      | <b>245</b>            | 174       | 71      | 419     |
| Silver (Ag)     | <b>648</b>            | 1905      | 0       | 2553    |
| Antimony (Sb)   | <b>3796</b>           | 11347     | 0       | 15143   |
| Selenium (Se)   | <b>19180</b>          | 40393     | 0       | 59573   |

<sup>a</sup> CEF>100 are listed in bold, showing significant PM toxic metal contamination from anthropogenic sources.
